# Supplementary material
Source: ML conference proceedings conference paper supplement (https://openreview.net/forum?id=ERv8ptegFi)
Supplement: supplementary_material [file attachment]

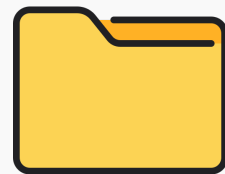

## Dataset

Load scenarios from the  
Waymo Open Motion  
Dataset (WOMD)

Scenario building blocks

tutorial 01

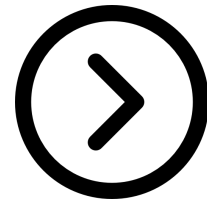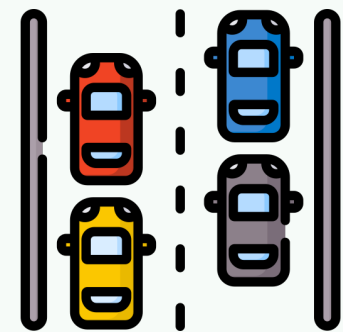

## Simulator

Understand GPUDrive  
simulator key concepts

tutorial 02

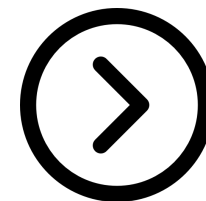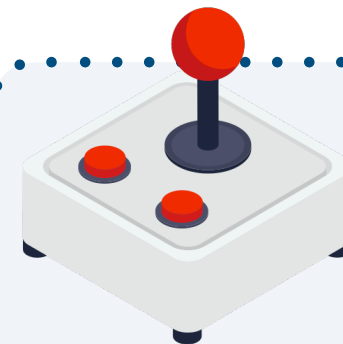

## Gym env

Work with a gymnasium  
wrapper to interface with  
the simulator

tutorial 03

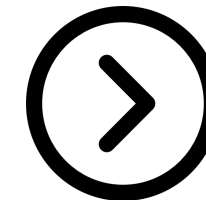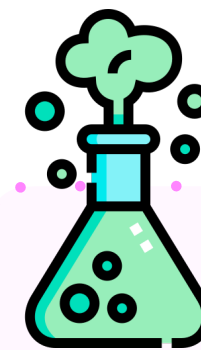

## Multiple actors

Populate scenes with  
different actors

tutorial 04

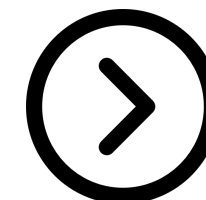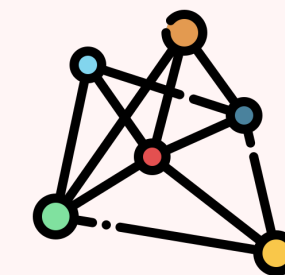

## Algorithms

baselines/ppo/
